# Supplementary material for: Green synthesis route for MCM-49 zeolite using a seed-assisted method by virtue of an ultraphonic aging procedure
Source: Royal Society of Chemistry journal article supplement (doi:10.1039/d1qi00179e), 2021-01-01
Supplement: d1qi00179e1.pdf [file d1qi00179e1.pdf]

SUPPORTING INFORMATION

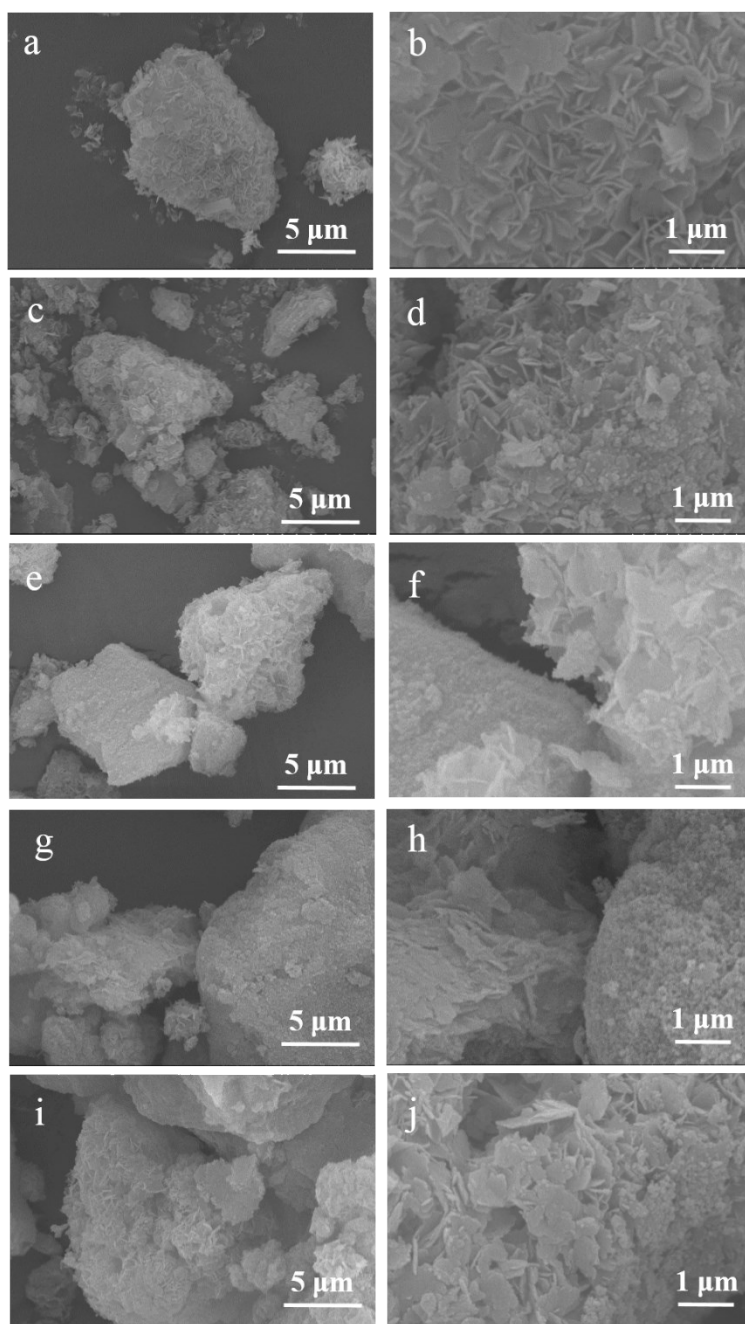

**Figure S1** SEM images of Seed and MCM-49-X-0 (a, b: Seed; c, d: MCM-49-B-0; e, f: MCM-49-U-0; g, h: MCM-49-S-0; i, j: MCM-49-M-0)

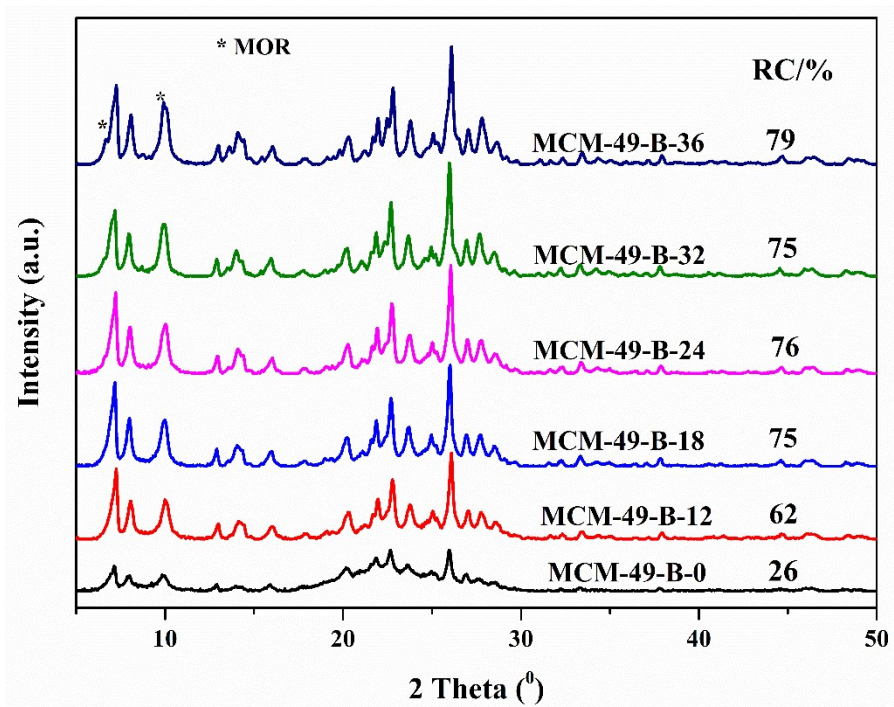

**Figure S2** Crystallization process of the synthesis systems without aging treatment

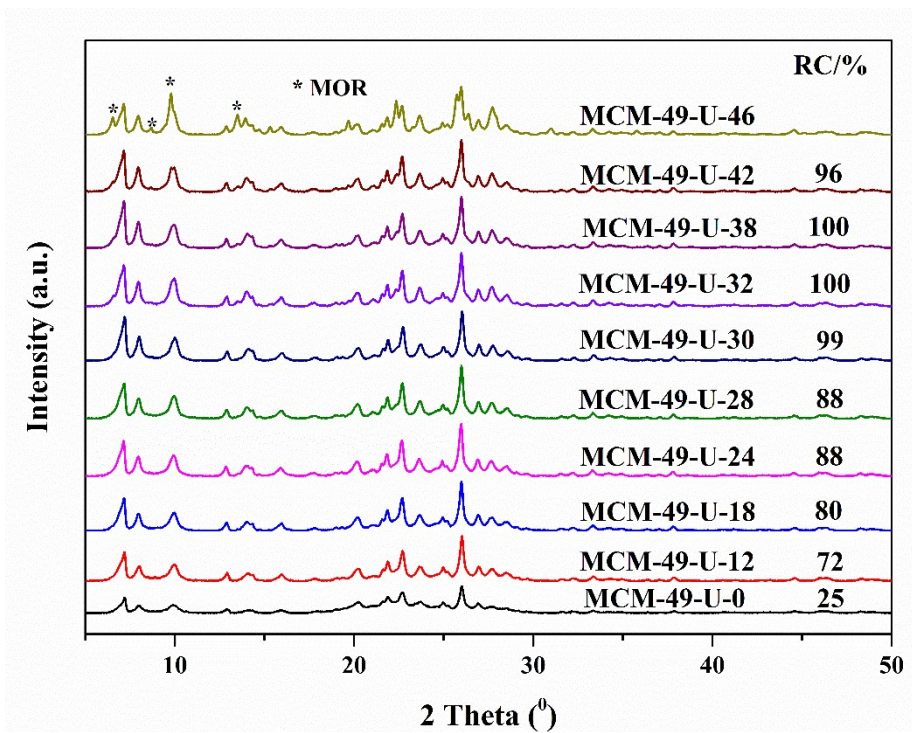

**Figure S3** Crystallization process of the synthesis systems with ultrasonic aging treatment

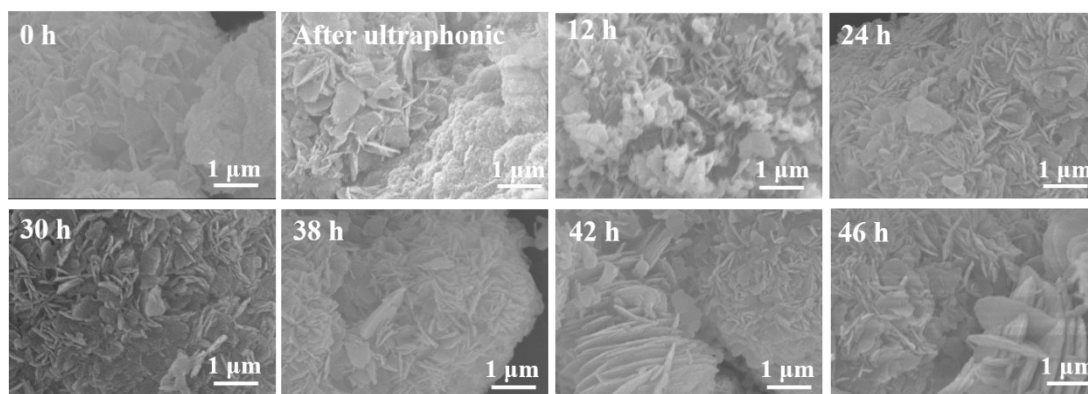

**Figure S4** SEM images of crystallization process of MCM-49-U-*t*

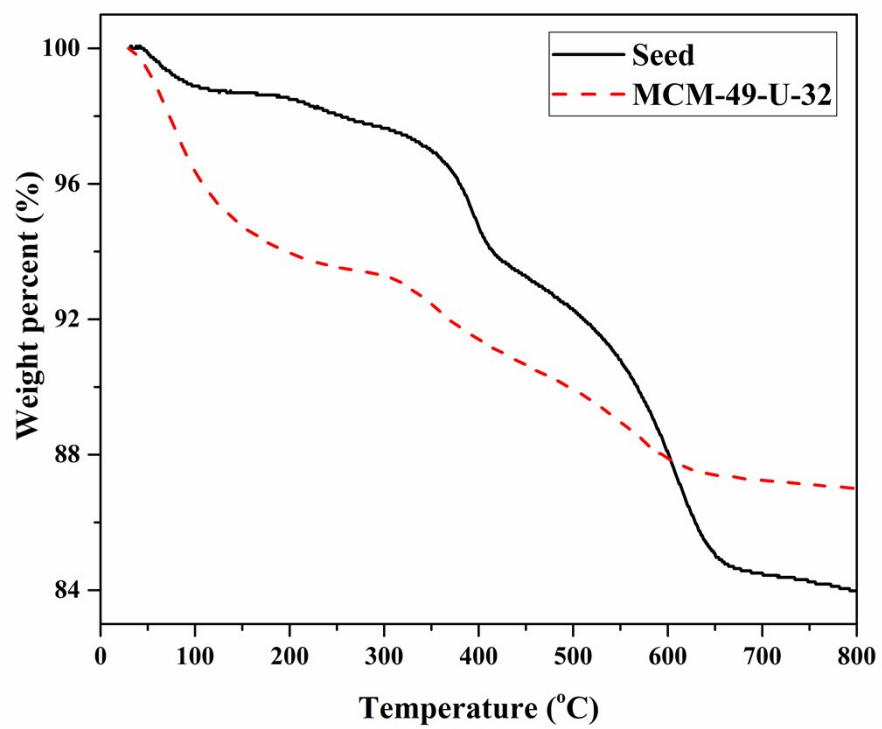

**Figure S5** TG analysis of Seed and MCM-49-U-32

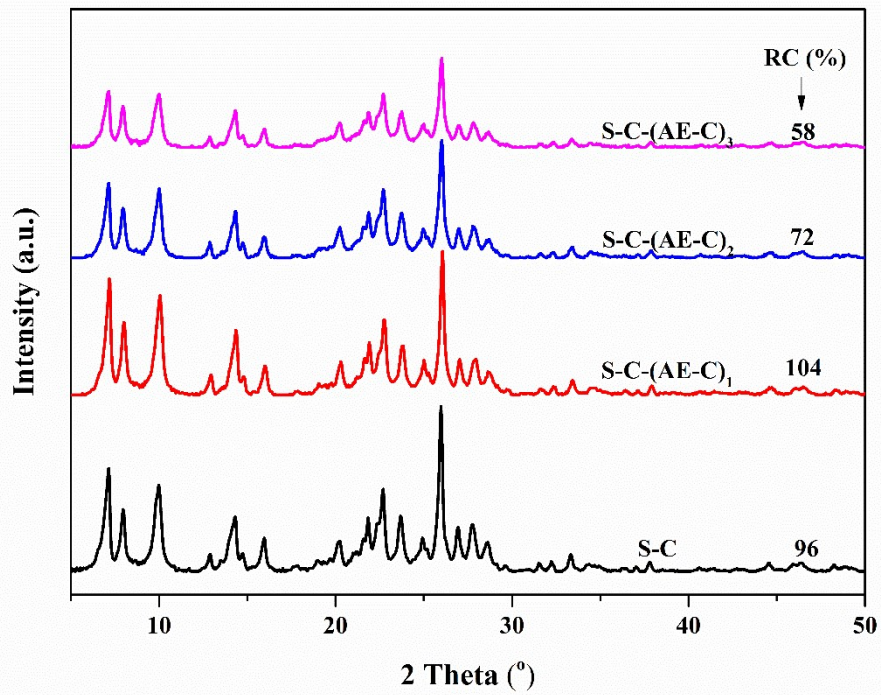

**Figure S6** XRD patterns of S-C and S-C-(AE-C)<sub>x</sub>

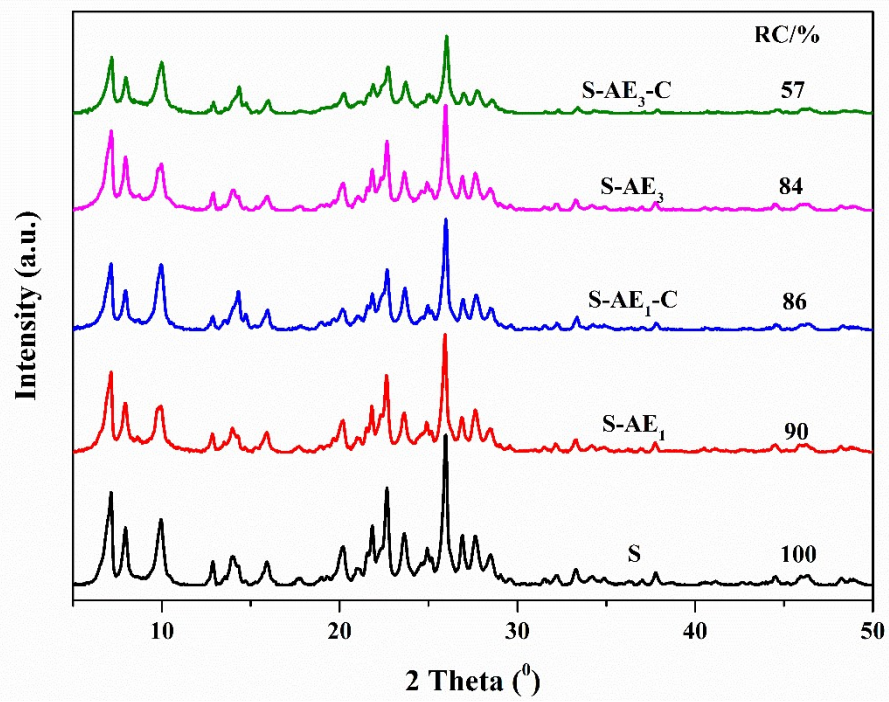

**Figure S7** XRD patterns of S-C, S-AE<sub>x</sub>, and S-AE<sub>x</sub>-C

**Table S1** SiO<sub>2</sub>/Al<sub>2</sub>O<sub>3</sub> molar ratio (SAR) and solid yield of MCM-49-*X*-32

| Samples         | MCM-49-B-32 | MCM-49-U-32 | MCM-49-S-32 | MCM-49-M-32 |
|-----------------|-------------|-------------|-------------|-------------|
| SAR             | 15.2        | 15.3        | 15.2        | 15.8        |
| Solid yield (%) | 40.3        | 37.3        | 41.0        | 42.2        |

**Table S2** Acidity of various samples by NH<sub>3</sub>-TPD.

| Samples                 | Acid concentration with various strength (mmol/g) |        |        | Total acid concentration (mmol/g) | SAR* |
|-------------------------|---------------------------------------------------|--------|--------|-----------------------------------|------|
|                         | Weak                                              | Medium | Strong |                                   |      |
| H-Seed                  | 0.317                                             | 0.331  | 0.137  | 0.785                             | 18.8 |
| S-C-(AE-C) <sub>2</sub> | 0.231                                             | 0.173  | 0.055  | 0.459                             | 15.1 |
| S-AE <sub>1</sub> -C    | 0.291                                             | 0.262  | 0.125  | 0.678                             | 15.0 |
| S-AE <sub>3</sub> -C    | 0.244                                             | 0.244  | 0.133  | 0.621                             | 15.1 |

\* SAR was calculated from XRF results.
